# Supplementary material for: Obstructive Sleep Apnoea Modulates Airway Inflammation and Remodelling in Severe Asthma
Source: PLoS One. 2016 Mar 2;11(3):e0150042. doi: 10.1371/journal.pone.0150042 (PMC4774979; doi:10.1371/journal.pone.0150042)
Supplement: S1 Original Data — (XLS) [file pone.0150042.s001.xls]

## Sheet: sputum & biopsy
IL-4 non osa	IL-8 non osa	PDGF BB non osa	VEGF non osa	IL5 non osa	MMP non osa	IL-4 osa	IL-8 osa	PDGF BB osa	VEGF osa	IL5 osa	MMP9 osa	pnn osa	pnn non osa	neutro biopsy osa	neutro biopsy non osa	tryptatse osa	tryptase non osas	rbm osa	rbm non osa	sm osa	sm non osa	vessels non osa	vessels osa
36.28	9085.75	78.91	450.04	10.84	91826.7	4.13	2739.1	7.98		6.19	88468.8	19	63	5.75		42.5	6.41	6.45	7.07	15.96	21.69	23.4	31.7
56.35	1374.25	183.88	601.92	18.6	43797.4	287.51	38476.1	172.02	221.28	10.99	211020	87	3.1		58.77	0	0	5.64	8.89	9.55	12.89	17.69	129.24
36.28	1101.92	17.99	264.15	7.06	24136.8	9.93	17080.3	22.95		2.39	65831.2	83	5		12.38	7.75	0	4.44	7.65	11.76	11.27	40.21	67.22
37.37	4461.49	145.89	187.8	3.96	19894.7	26.52	27573	100.53	88.74	3.69	92181.1	43	3		0	99.2	16.12	9.12	6.44	3.68	4.51	8.51	22.52
44	1985.38	124.45	454.48	11.46	91191.4	13.96	1348.26		66.52	2.64	16831.8	34	8	61.7	0	116	112.42	8.24	7.9	9.03	0.97	62.16	73.84
71.21	2134.16	153.03	555.06	13.68	2104.13	20.17	5558.59	66.85	309.08	5.06	112725	48	4	219.54	110.9	149	111.61	5.91	7.17	8	14.66	33.62	40.2
14.98	791.55	54.74	335.5	7.95	1337.53	9.93	28158	22.95	126.24	4.23	110037	31.3	5			39		6.3	11.56	10.34	5.33	11.76	32.05
45.12	2814.17	143.51	555.06	11.62	934.81	38.47	29418.6	202.81	309.08	5.62	204818	86	5			37.3	63.32	5.92	7.9	12.32	0.97	62.16	68.74
22.27	1163.63	124.45	187.8	5.34	5676.76	6.99	12384.4		173.52	3.69	82229.9	50	6	59.95	0	0		5.74	9.61	9.92	28.84	38.8	34.16
6.02	8971.57	66.85	142.9	3.16	11347.6	45.12	586.93	49.88	350.84	8.1	10142.3	70	29	2.36	3.953		96	5.5	8.13	37.78	15.86	87.7	62.5
32.4	1265.87	157.68	477.2	16.83		6.02	13451.5	2.88	66.52	3.29	94023	11.6	9		110.904	0	270	3.28	7.26	6	10.83	44.72	176.68
						39.57	1955.06	86.13	445.59	16.61	56462.8	53		71.31				5.7	6.08	20.09	26	38.03	14.8
						8	12457.5	2.88		9.2	87213	67			2.91	31	156.5	5.02	8.21	15.58	10.13	119.96	62.5
						43.56	2012.02	67.82	409.95	2.5	12321.6	78		9.33	3.621	0	29.6	4.8	11.33	5.96	12.13	0
														45			94		6.35		16.67	19.69
															56.49				6.71		10.96	76.65
														17.7					4.45		6.3	37.29
															5.5
															66.48		64
														19	2.53
															2.16
														139	117.09
														3.44
														19
															37.95

## Sheet: clincal data 
pichot osa	pichot non osa	ihaled steroid dose non osa	inhaled steroids dose osa	epworth osa	epworth non osa	depression scale osa	depression scale non osa	ahi non osa	ahi osa	minimal spo2 osa	minimal spo2 non osa	mean spo2 non osa	mean spo2 osa	index osa	index non osa	%	%	age osa	age non osa	bmi osa	bmi non osa	asthma age onset osa	asthma age onset non osa	act osa	act non osa	FEV1 non saos	FEV1 saos	FEV1/CV osa	FEV1/CV non osa
	5	2000	2000	4	18	4	30	1	21	85	90	93.4	94.9	16.4	0.5	0.7	0	28	39	50.5988	28.6689	7	3	7	5	58	83	66	57
12	14	1600	1600	11	5	0	17	3.14	16	76	94	96	93	15.9		5.4		58	30	44.8545	23.04	6	26		7	55	69	65	55
26	9	2000	2000	16	11	21		2	10.9	82	95		93	5.9	0.66	0.5	0	78	29	29.3947	23.9512	57	15	12		41	46	42	43
	4	2000	2000	18		35		0.9	12	85	88		91.9	12.3		8.6		34	57	24.093	27.5482	14	21	6	12	67	81	54	61
22		2000	2000	15	12	23		1	5	91			94.8	1.4		0		49	66	23.6614	32.4619	18	5	10	16	51	76	51	52
3	21	1600	1600	4		34		4.2	21	84	97	94	93	16.5	2.6	1.8	1.3	73	57	28.5665	32.4622	70	0	8		56	118	69	40
19		2000	2000	4		19		0	6	85	90		90.4	11.5		27.6		54	40	29.9688	24.977	30	10	8		116	83	84	92
23		2000	2000	13	15	25	26	1.6	12	90			95.3	7.3		0		40	55	25.5296	25.7276	18	33		8	23	70	60	27
22	6	2000	2000	8	21	34	24	3	6	87	88	93.4	92.9	12.1	4.5	0	0.6	24	50	39.5558	32.8125	1	40			84	63	69	71
25		2000	2000	8	1	30		0	17.4	82			93	8.7	1.6	2.1	0	63	39	24.977	26.079		5	8	6	46	86	54	62
	24			13	7			2	30	85	90	93.6	93.6	31	1.8	32	0	49	70	24.9	30.8185		30		7	104			71
24	17	2000	2000		11		24	1	35	79								62	36	32.2421	35.3386	15	1	19	10	36	38	40	46
24	21	2000	2000	0	24	49	23	1	20	89	65	96	94	11.4	2.2	0	1.6	52	46	27.7634	19.7055	41	0	10	7	73	57	67	56.4
		2000	2000	12	10	11	8	1.5	9.2	86			94.2	10.6	0.8	2.3	0	47	36	31.9922	22.3082	42	29	17	9	91	78	64	71
19		1600	1600	10	7	22	17	0.12	14.8	86	94			14.6	0.49	0.11	0	47	36	26.4915	27.5312	39	28	15		57	72	54	82
		2000	2000	15	12	31	24	1.4	13	88	92	95	95	7.7	1.4	0.5	0	54	46	23.1405	23.7954	20	8		8	36	97	76	40
	11	2000	2000	9	15	22	31	0.6	10	82	94			14.38	0.6	3.22	0	31	56	46.0408	19.7777		30	20		82	93	69	61
		2000	2000	2	17		31	2.9	7	86	84	96	92	13.5		3.1		42	58	32.001	30.8185	28	1		8	78	52	49	69
22		2000	2000		15	23		3.4	6	78	89	97	93	6.5	0.3	0.9	0	53	38	26.6389	31.2175	2	35	8	12	100	97	79	77
28	22	2000	2000		8		11	2.6	12	85	81	96			12.1		0.1	46	49	24.841	27.9155	26	45			57	58	60	71
32	24	1600	1600	15	17	24	35	2	10	89	84	97.8			0.4	2	0.4	66	36	27.9904	25.3934	25	10	9	22	47	24	57	61
18	16	2000	2000		20		12	2.5	12	91	87				1.9			56	41	24	25.2092	41	6	7	9	59	58	69	65
21		2000	2000	8	10	13	16	2	8	88	73	96	94	11.9	2.9	0.3	2.1	40	42	35.2011	23.939		30	6	20	85	90	65	59
23	22	2000		16	2	23	44	1	35	84	88	93.4	94.4	36.9	1.1	1.2	0.8	63	59	24	31.6032	40		9	8	71	66	66	48
23	20	2000		10	7	30	28	1	7	91	86	92.3	95	4.4	1	0	1.5	57	48	20.5151	32.7449	52		6	12	110	39	56	57
32		2000		18	10	38	18	3	15.9		90	95.3		15	2.8		0	52	40	21.875	32.4219	45	33	8	6	58	78	83	62
	11	2000		12	19	1	9	3.2	10	89	84		94	4.7	5.3	0	5.7	63	32	29.0547	19.721	16	7	8	18	93	47	47	73
								3.7							2.95				17		24.9135		8		11	55			84
